# Supplementary material for: Anti-tumor Activity of miniPEG-γ-Modified PNAs to Inhibit MicroRNA-210 for Cancer Therapy
Source: PubMed Central journal article supplement — Mol Ther Nucleic Acids. 2017 Sep 12;9:111–9. doi: 10.1016/j.omtn.2017.09.001 (PMC5633812; doi:10.1016/j.omtn.2017.09.001), 2017-09-12
Supplement: mmc1.pdf [file mmc1.pdf]

OMTN, Volume 9

## Supplemental Information

### **Anti-tumor Activity of miniPEG- $\gamma$ -Modified PNAs to Inhibit MicroRNA-210 for Cancer Therapy**

**Anisha Gupta, Elias Quijano, Yanfeng Liu, Raman Bahal, Susan E. Scanlon, Eric Song, Wei-Che Hsieh, Demetrios E. Braddock, Danith H. Ly, W. Mark Saltzman, and Peter M. Glazer**

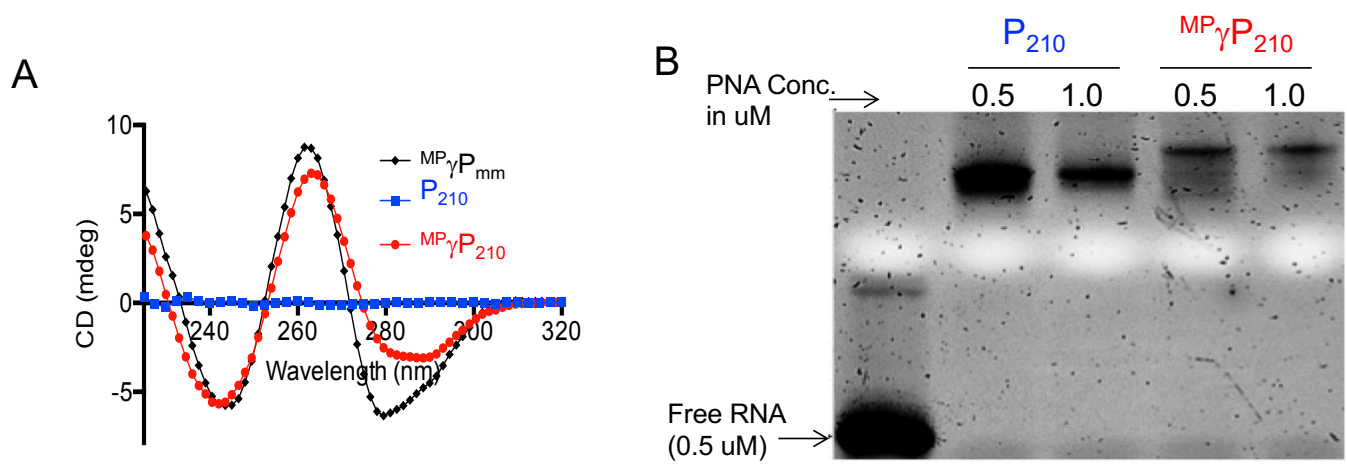

**Figure S1. PNA characterization.** (A) CD analysis denoting chiral structure of gamma PNAs as compared to that of regular PNA. (B) Gel shift analysis of regular and gamma PNA binding to miR-210.

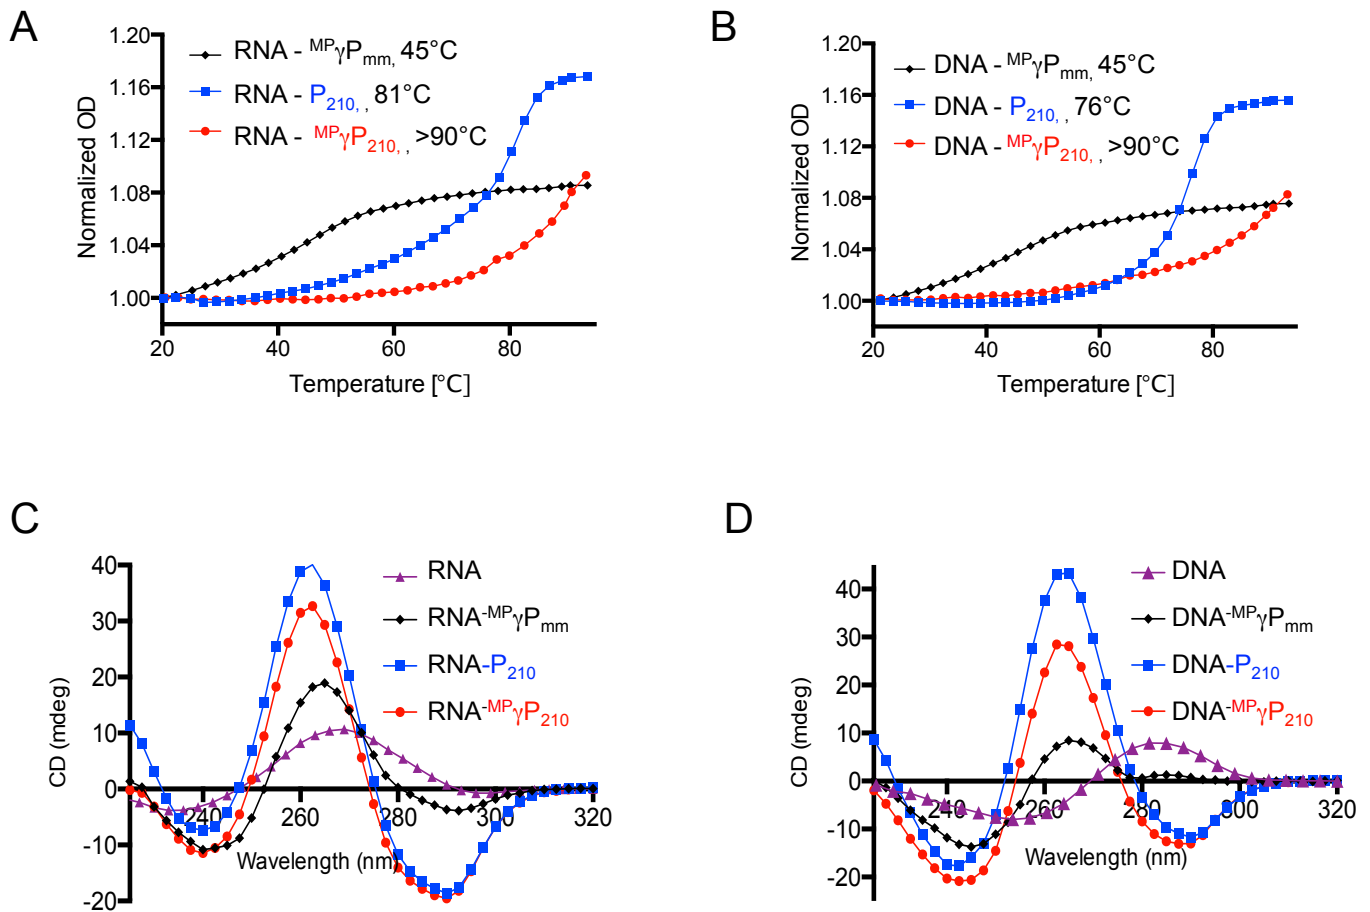

**Figure S2. UV melting and CD analysis** (A) UV melting profiles of RNA-PNA duplexes at 1  $\mu$ M strand concentration each in sodium phosphate buffer (10 mM sodium phosphate, 100 mM NaCl, 0.1 mM EDTA, pH 7) containing 5 M Urea. (B) UV melting profiles of DNA-PNA duplexes at 1  $\mu$ M strand concentration each in sodium phosphate buffer. CD characterization. (C) RNA-PNA duplexes (D) DNA-PNA duplexes at 5  $\mu$ M strand concentration each in sodium phosphate buffer (10 mM sodium phosphate, 100 mM NaCl, 0.1 mM EDTA, pH 7) containing 5 M Urea.

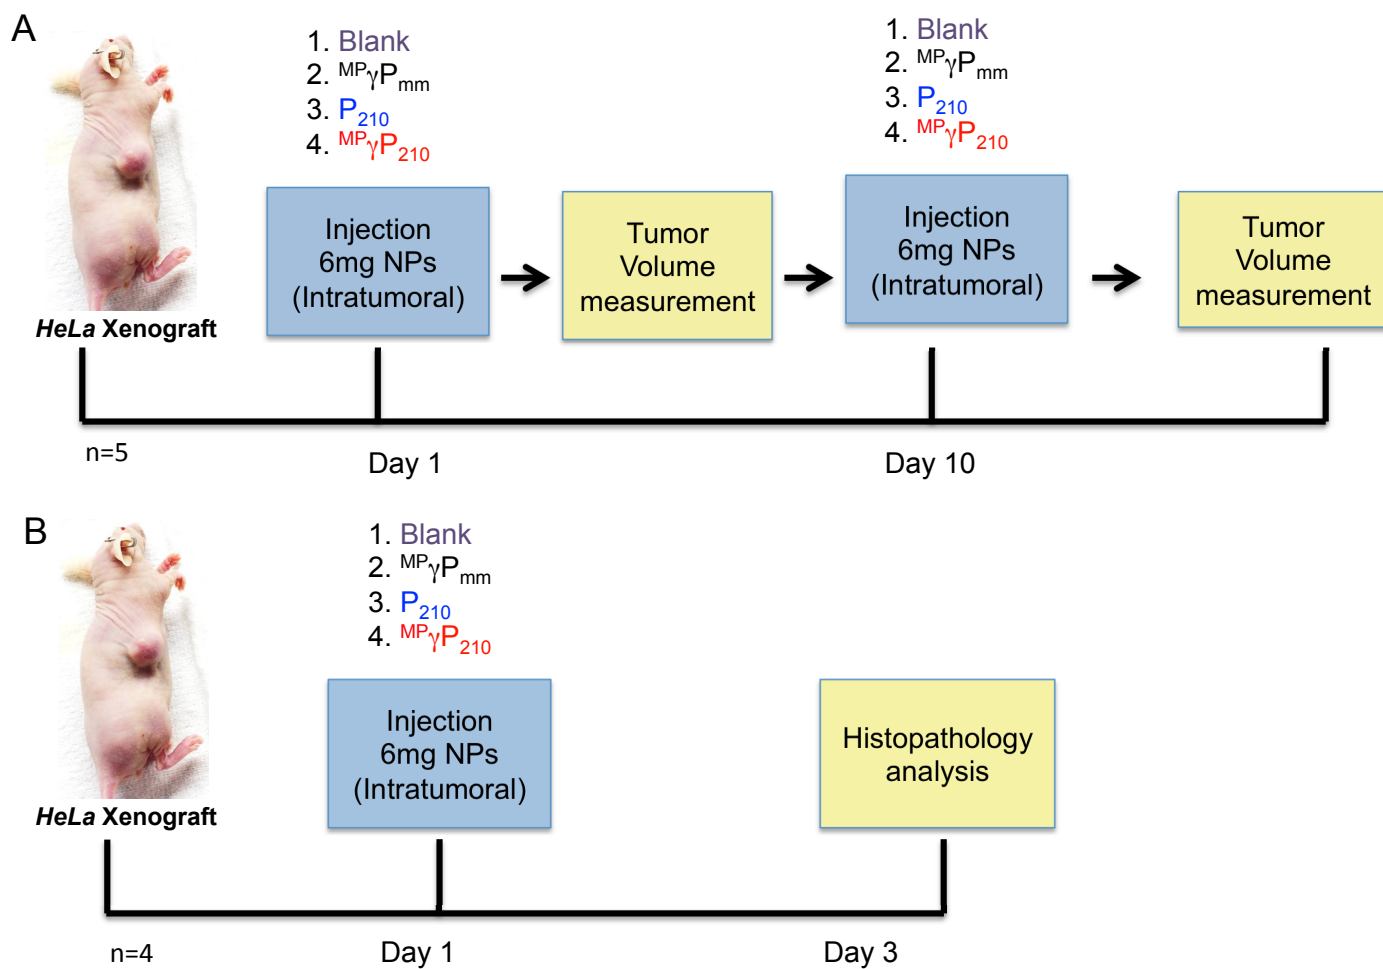

**Figure S3. Experimental scheme for mouse tumor studies.** (A) Workflow for treatment of HeLa xenografts for tumor growth delay studies. (B) Workflow for histopathological analysis of treated tumors.

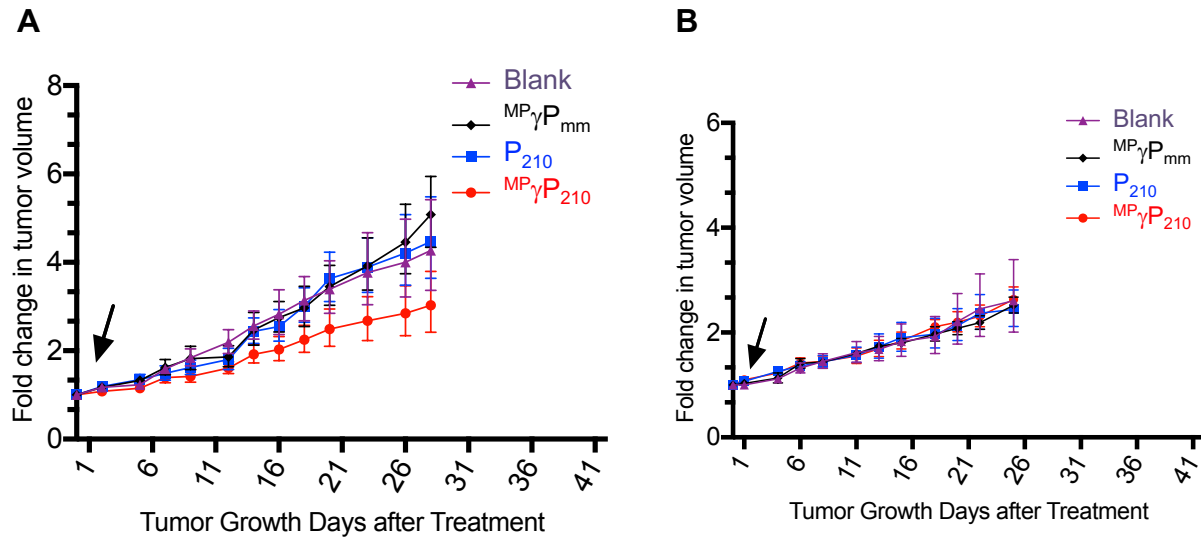

**Figure S4.** Additional tumor growth delay assays. (A) Fold-change in tumor growth in response to non-formulated PNA administered antimiRs. Arrowhead represents 100  $\mu$ M PNA injection. (n=5 for each group, data represented as mean  $\pm$ SEM). ANOVA was used for statistical analysis for each group relative to Blank group. (B) Fold-change in tumor growth in response to intravenously administered NPs as indicated (via retro-orbital injection). Arrowhead represents 12 mg nanoparticle injection. (n=5 for each group, data represented as mean  $\pm$ SEM). ANOVA was used for statistical analysis for each group relative to Blank group.

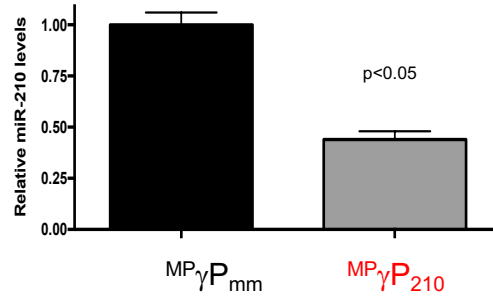

**Figure S5.** Relative miR-210 levels in RNA extracted from murine stromal cells isolated from xenograft tumors treated with the indicated nanoparticles. (n=3, data represented as mean  $\pm$ SE); t test was used for statistical analysis,  $p<0.05$ .

| <b>Table 1. Charge potential and size analysis of the nanoparticles.</b> |                            |                      |
|--------------------------------------------------------------------------|----------------------------|----------------------|
| <b>NP</b>                                                                | <b>Zeta Potential (mV)</b> | <b>Diameter (nm)</b> |
| Blank                                                                    | -19.0 ± 0.6                | 290 ± 5.1            |
| <sup>MP</sup> γP <sub>mm</sub>                                           | -23.5 ± 0.2                | 320 ± 1.8            |
| P <sub>210</sub>                                                         | -28.0 ± 0.5                | 390 ± 6.9            |
| <sup>MP</sup> γP <sub>210</sub>                                          | -23.5 ± 0.3                | 310 ± 5.0            |
